# Supplementary material
Source: MDPI journal article supplement (https://www.mdpi.com/2073-4352/14/1/65)
Supplement: s1 [file s1]

## **Supplementary Information**

### **ZnO-Au Hybrid Metamaterials Thin Films with Tunable Optical Properties**

Nirali A. Bhatt<sup>1</sup>, Robynne L. Paldi<sup>1</sup>, James P. Barnard<sup>1</sup>, Juanjuan Lu<sup>1</sup>, Zihao He<sup>2</sup>, Bo Yang<sup>1</sup>, Chao Shen<sup>1</sup>, Jiawei Song<sup>1</sup>, Raktim Sarma<sup>3</sup>, Aleem Siddiqui<sup>3</sup>, Haiyan Wang<sup>1,2, \*</sup>

<sup>1</sup>School of Materials Engineering, Purdue University, West Lafayette, Indiana 47907, USA

<sup>2</sup>School of Electrical and Computer Engineering, Purdue University, West Lafayette, Indiana 47907, USA

<sup>3</sup>Sandia National Laboratory, Albuquerque NM, USA

\*Corresponding Author: [hwang00@purdue.edu](mailto:hwang00@purdue.edu)

|                                       | Film          |               |               |
|---------------------------------------|---------------|---------------|---------------|
|                                       | ZnO+10%mol Au | ZnO+20%mol Au | ZnO+30%mol Au |
| Actual mol% of Au in composite target | 9.09% Au      | 16.7% Au      | 23.1% Au      |

**Table S1:** Table of the actual mol% of Au in the composite ZnO-Au target.

(a)

| Z  | Element | Family | Atomic Fraction (%) | Atomic Error (%) | Mass Fraction (%) | Mass Error (%) | Fit Error (%) |
|----|---------|--------|---------------------|------------------|-------------------|----------------|---------------|
| 13 | Al      | K      | 17.97               | 3.42             | 7.81              | 0.88           | 0.62          |
| 30 | Zn      | K      | 79.29               | 18.44            | 83.52             | 14.55          | 0.15          |
| 79 | Au      | L      | 2.73                | 0.60             | 8.67              | 1.37           | 0.81          |

(b)

| Z  | Element | Family | Atomic Fraction (%) | Atomic Error (%) | Mass Fraction (%) | Mass Error (%) | Fit Error (%) |
|----|---------|--------|---------------------|------------------|-------------------|----------------|---------------|
| 13 | Al      | K      | 13.97               | 2.56             | 5.57              | 0.59           | 0.39          |
| 30 | Zn      | K      | 80.23               | 18.20            | 77.54             | 13.18          | 0.19          |
| 79 | Au      | L      | 5.80                | 1.25             | 16.89             | 2.59           | 0.21          |

(c)

| Z  | Element | Family | Atomic Fraction (%) | Atomic Error (%) | Mass Fraction (%) | Mass Error (%) | Fit Error (%) |
|----|---------|--------|---------------------|------------------|-------------------|----------------|---------------|
| 13 | Al      | K      | 9.75                | 1.60             | 3.24              | 0.29           | 0.10          |
| 30 | Zn      | K      | 75.42               | 15.93            | 60.78             | 9.80           | 0.18          |
| 79 | Au      | L      | 14.83               | 2.94             | 35.98             | 5.17           | 0.21          |

**Figure S1:** Table showing composition from EDS mapping of the (a) ZnO+10%mol Au, (b) ZnO+20%mol Au, and (c) ZnO+30%mol Au films. This shows the actual amount of Au in the films after deposition.

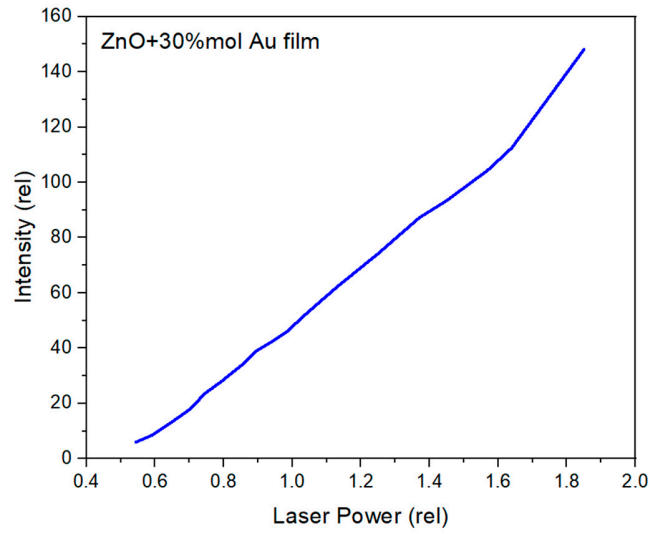

**Figure S2:** Initial second harmonic generation (SHG) measurements for the ZnO+30%mol Au film. There is no SHG behavior due to a linear relationship between power and intensity.

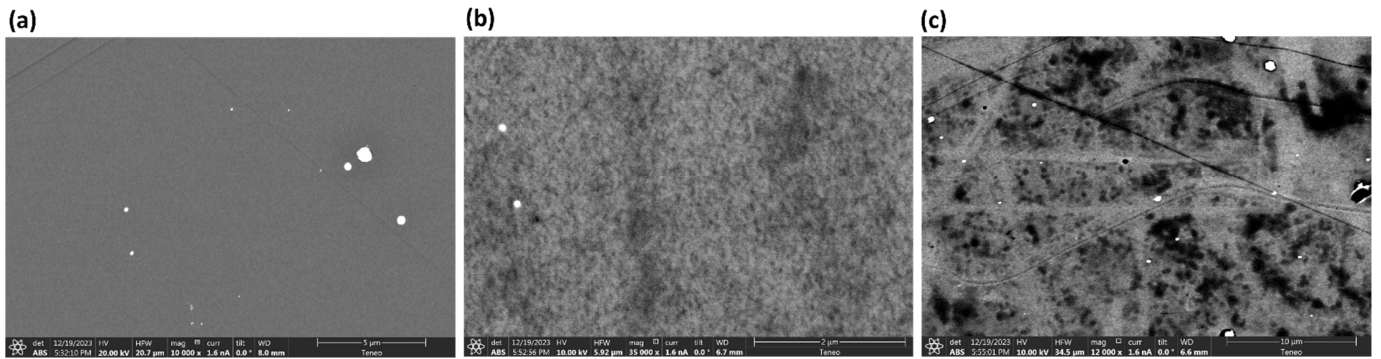

**Figure S3:** Backscattered electron (BSE) SEM images of the (a) 10% Au, (b) 20% Au, and (c) 30% Au samples. The bright contrast spots are the Au while the gray contrast area is the ZnO.
